# Supplementary material for: Metabolomics profiling reveals differences in proliferation between tumorigenic and non-tumorigenic Madin-Darby canine kidney (MDCK) cells
Source: PeerJ. 2023 Sep 20;11:e16077. doi: 10.7717/peerj.16077 (PMC10517658; doi:10.7717/peerj.16077)
Supplement: Supplemental Information 10 [file peerj-11-16077-s010.xlsx]

## Sheet: M60 VS CL23 cells growth 
Day(d)	cell concentration of M60 cell（× 104）	cell concentration of CL23 cell（× 104）		Hours(h）	specific growth rate(μ/h)
0	0.5	0.5		24 h	0.0110599	0.0549619
	0.5	0.5			0.0110599	0.065185
	0.5	0.5			0.00179415	0.0948434
1	1.83	1.87		48 h	0.0534219	0.0406445
	5.87	2.39			0.0243631	0.00286308
	4.43	4.87			0.0336288	-0.0220326
2	5.22	4.96		72 h	0.04168	0.00140416
	6.26	2.56			0.0955834	0.0240548		hours(h）
	4.13	2.87			0.0944916	0.0282226
3	7.39	4.56		96 h	0.0571712	0.01665
	10.3	5.13			0.0279733	0.00417014
	17.3	5.65			0.0250203	0.0237887
4	34.9	5.04		120 h	0.0377132	0.0330253
	48.5	7.65			0.0519618	0.072041
	40.8	10			0.0403079	0.0216164
5	98.3	16.9		144 h	-0.00248007	0.0500668
	76.8	28.4			-0.0138933	0.0181469
	118	16.8			0.00926689	0.048573
6	90.5	56.2
	92.8	43.9
	107	53.9

## Sheet: XF06 VS XF04 cells growth 
Day(d)	cell concentration of XF04 cell（× 106）	cell concentration of XF06 cell（× 106）		Hours(h）	specific growth rate(μ/h)
0	1	1		24 h	0.0393294	0.0260808
	1	1			0.0393294	0.0206123
	1	1			0.0368236	0.026303
1	2.57	1.87		48 h	0.0415114	0.0225139
	2.57	1.64			0.0397381	0.0278523
	2.42	1.88			0.0423686	0.0211067
2	6.96	3.21		72 h	0.0183069	0.0133279
	6.67	3.2			0.034593	0.0126007
	6.69	3.12			0.0341951	0.0144184
3	10.8	4.42		96 h	0.013409	0.00963564
	15.3	4.33			0.0119868	0.00881371
	15.2	4.41			0.0134678	-0.00334299
4	14.9	5.57
	20.4	5.35
	21	4.07
5	14.9	4.26
	19.4	3.86
	19.3	3.59

## Sheet: CL23+choline chloride  cells 
Day(d)	cell concentration of CL23 cell（× 104）	cell concentration of CL23 cell+choline chloride（× 104）		Hours(h）	specific growth rate(μ/h)
0	1	1		24 h	0.060969	0.0626699
	1	1			0.0454268	0.047543
	1	1			0.0592962	0.0486595
1	4.32	4.5		48 h	0.0328348	0.0330623
	2.975	3.13			0.0477138	0.0494269
	4.15	3.215			0.036436	0.0431224
2	9.5	9.95		72 h	0.0187529	0.0156907
	9.35	10.25			0.0207913	0.031443
	9.95	9.05			0.0269528	0.0328315
3	14.9	14.5		96 h	0.031979	0.0497032
	15.4	21.8			0.0521985	0.0338312
	19	19.9			0.0352727	0.0369463
4	32.1	47.8		120 h	0.0360211	0.016132
	53.9	49.1			0.0154525	0.0156599
	44.3	48.3			0.0215469	0.0150422
5	76.2	70.4		144 h	-0.00995904	0.00480227
	78.1	71.5			-0.0109852	0.00415627
	74.3	69.3			-0.0102477	0.00726472
6	60	79
	88.2	99.5
	58.1	82.5

## Sheet: XF06+choline chloride  cells 
Day(d)	cell concentration of XF06 cell（× 106）	cell concentration of XF06 cell+choline（× 106）		Hours(h）	specific growth rate(μ/h)
0	1	1			XF06	XF06+choline chloride
	1	1		24	0.0179909	0.013721
	1	1			0.0225968	0.0157682
1	1.54	1.39			0.0260808	0.0102858
	1.72	1.46		48	0.0300812	0.0231027
	1.87	1.28			0.0178523	0.0256173
					0.0169686	0.0295271
2	3.17	2.42		72	0.0157844	0.0256606
	2.64	2.7			0.0278424	0.0226506
	2.81	2.6			0.0214324	0.0243127
				96	0.0244211	0.0097417
3	4.63	4.48			0.010963	0.0102017
	5.15	4.65			0.0115411	0.0136089
	4.7	4.66
4	8.32	5.66
	6.7	5.94
	6.2	6.46
5	3.02	4.54
	3.9	4.87
	6.24	4.94
